# Supplementary material for: Beyond negative valence: 2-week administration of a serotonergic antidepressant enhances both reward and effort learning signals
Source: PLoS Biol. 2017 Feb 16;15(2):e2000756. doi: 10.1371/journal.pbio.2000756 (PMC5331946; doi:10.1371/journal.pbio.2000756)
Supplement: S6 Data — (XLSX) [file pbio.2000756.s020.xlsx]

## Sheet: QuestionnaireScores
Participant ID	Group (1=citalopram, 0=placebo)	Gender (male=1)	Age	Trait anxiety (before)	BDI (b)	State anxiety (b)	PANA positive (b)	PANAS negative (b)	Alertness (b)	Contentedness (b)	Calmness (b)	Trait anxiety (after)	State anxiety (a)	BDI (a)	Cloninger scale (a)	Blinding (a)	PANAS positive (a)	PANAS negative (a)	Alertness (a)	Contentedness (a)	Calmness (a)
p102	0	1	26	44	0	NAN	NAN	NAN	NAN	NAN	NAN	NAN	41	NAN	NAN	2	30	21	NAN	NAN	NAN
p103	0	1	24	37	5	34	31	16	NAN	NAN	NAN	NAN	NAN	6	9	-6	NAN	NAN	NAN	NAN	NAN
p104	1	2	25	36	2	31	31	16	17.7	18.72	38.8	39	34	5	9	0	37	19	16.8	32.2	80.5
p105	0	2	25	22	0	21	37	10	21.3	14.04	27.7	25	24	0	14	8	32	10	25	22.2	61
p106	1	1	24	22	1	22	39	15	42.1	24.49	28.6	20	NAN	4	13	NAN	NAN	NAN	19.9	11.2	10.5
p107	1	1	23	25	0	25	34	11	20.6	9.07	9.8	29	27	0	10	8	35	14	8.2	8.8	52.5
p108	0	2	28	43	7	51	19	25	NAN	NAN	NAN	48	34	7	9	NAN	27	11	62.8	53.6	58.2
p110	1	1	23	28	1	48	33	26	36.2	53.83	21.3	34	30	1	17	6	36	18	18.8	21.6	26.5
p114	1	1	21	33	0	37	29	15	38.3	24.74	19.1	29	33	3	10	5	24	12	45.2	39.8	49.5
p115	1	2	23	24	0	NAN	NAN	NAN	25.1	19.79	26.8	25	24	2	13	3	36	10	22.3	15.8	20
p117	0	1	23	39	2	45	24	16	62.5	49.69	45.4	35	33	2	14	7	NAN	NAN	31.6	34.8	48
p118	1	1	27	42	2	36	29	13	NAN	NAN	NAN	38	34	1.5	9	-6	27	10	49.4	29.5	27.8
p119	0	1	20	26	0	27	36	13	33.7	23.67	31.1	27	27	0	14	-8	35	10	26	28.4	21.9
p122	0	1	19	37	3	31	38	14	47.1	42.02	27.3	38	38	4	13	-8	32	11	29.3	26.9	40.4
p124	0	2	22	42	1.5	41	31	19	56.7	43.64	44.4	56	37	7.5	6	4	24	18	52.2	52.3	47.9
p125	0	2	21	24	0	27	38	11	25.5	13.94	25.8	22	24	1.5	14	-7	31	10	20.9	23	69
p127	0	1	28	24	0	31	34	12	30.1	27.84	51	34	25	2.5	10	-6	28	15	18.3	20.8	20
p128	1	2	21	28	4.5	30	26	11	43.8	35.26	32	27	31	2	14	1	25	10	53.8	34.8	34.5
p131	1	1	19	24	0	31	31	12	31.4	34.64	32.5	29	20	2.5	11	9	35	10	22.5	17.3	23.2
p132	1	1	36	30	2	26	34	11	11.7	11.34	15.5	28	28	2	18	7	40	11	10.2	2.8	2
p133	0	1	21	32	0	32	39	13	27.9	22.22	20.2	22	23	1	19	4	39	13	50.6	25.9	18.4
p137	1	1	19	40	2	50	17	17	40.2	46.6	43.3	41	31	4	16	-9	27	10	31.2	31.1	26.8
p138	0	2	19	26	0	33	23	12	50.9	39.38	50.5	31	34	3	11	-6	26	11	51.3	32.5	44.4
p139	1	2	27	36	5	44	24	14	60.1	45.92	25.5	46	33	11	14	10	30	11	32.7	35.5	28.6
p143	0	1	21	27	1	29	27	10	44.4	30.82	21.4	30	33	1	20	-7	27	10	31.6	30.3	50
p145	1	2	18	23	0.5	22	36	17	27.3	4.12	65.5	22	31	8.5	18	-9	30	19	52	21.8	78.6
p146	1	2	22	27	0	25	33	10	NAN	NAN	NAN	25	25	2.5	15	6	34	10	NAN	NAN	NAN
p147	1	2	21	24	2	23	32	12	61.9	5.57	2.6	24	20	2	14	7	32	10	3.3	3.5	3.1
p148	0	2	22	34	1	25	33	10	46.6	24.33	38.1	30	27	1.5	14	-1	NAN	NAN	63.9	27.9	24.5
